# Supplementary material
Source: PubMed Central journal article supplement (PMC4648715)
Supplement: NIHMS72111-supplement-1.pdf [file NIHMS72111-supplement-1.pdf]

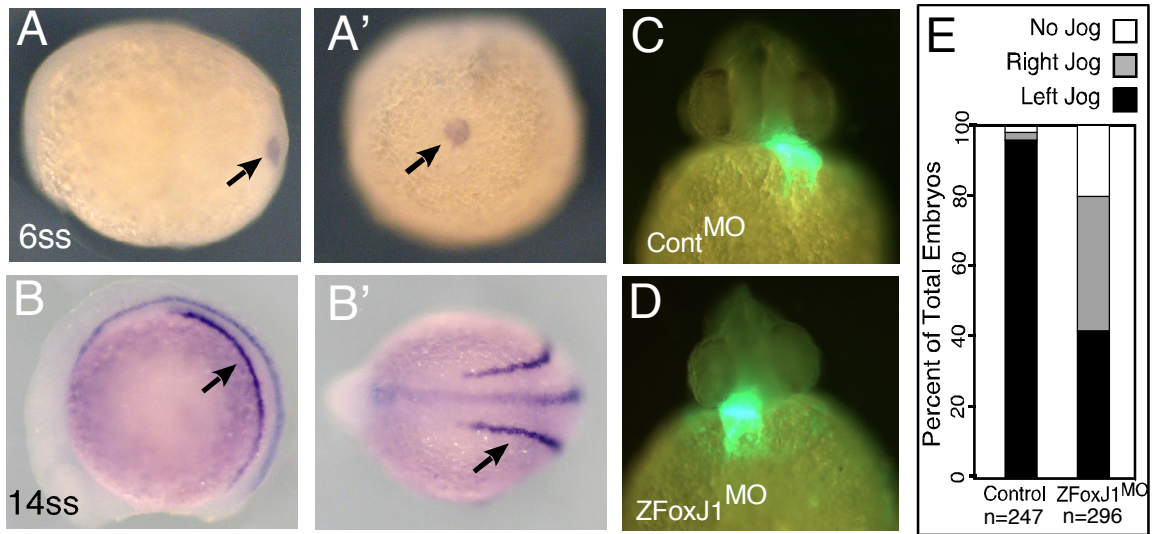

Supplementary Figure 1: *ZFoxJ1* RNA expression and function in ciliated cells of Zebrafish embryos.

(A-B) At the 6ss stage (A,A'), *ZFoxJ1* RNA is expressed prominently in KV (arrow). Shown are a side (A) and posterior (A') view. At the 14S stage (B,B'), *ZFoxJ1* is expressed prominently in the developing pronephros. Shown is a side (B) and dorsal (B') view. (C-E) Left-right organ orientation was measured in control morphants (C) and *ZFoxJ1* morphants (D) using a transgenic line where GFP is expressed in the looping heart primordium under the control of myosin light chain 2A promoter. Control morphants have normal left-right asymmetry while that of *ZFoxJ1* morphants is randomized (E).

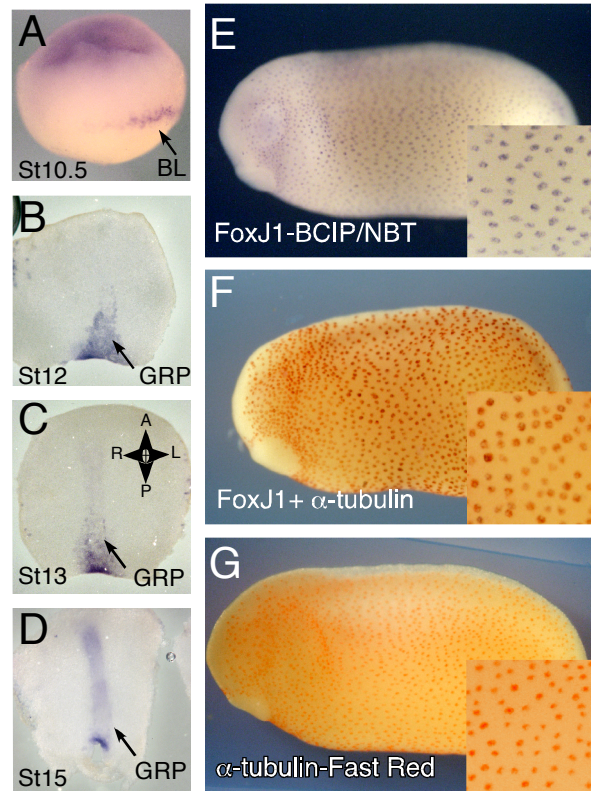

Supplementary Figure 2: Expression of *XFoxJ1* RNA in ciliated cells of *Xenopus* embryos.

(A) Shown is a stage 10.5 *Xenopus* embryo stained for the expression of *XFoxJ1* RNA using whole-mount in situ hybridization. Embryo is oriented with dorsal side to the right and animal pole up. Note expression of *XFoxJ1* RNA in cells located above the blastopore lip (BL) on the dorsal side, overlapping with the limit of involution. (B-D) Shown are dorsal explants at the indicated stage stained for the expression of *XFoxJ1* RNA. Note *XFoxJ1* expression is detected in the GRP at stage 12 but disappears by stage 15, when expression is first detected at the midline most likely in the neural plate. Expression of *XFoxJ1* RNA extends from the GRP around the blastopore opening. All panels oriented as denoted in C. (E-G) *Xenopus* embryos at stage 26 were stained with a *XFoxJ1* probe using BCIP/NBT (E), with an  $\alpha$ -tubulin probe using fast red (G), or with both probes together (F). Note that the cells expressing *XFoxJ1* are the ciliated cells stained for  $\alpha$ -tubulin.

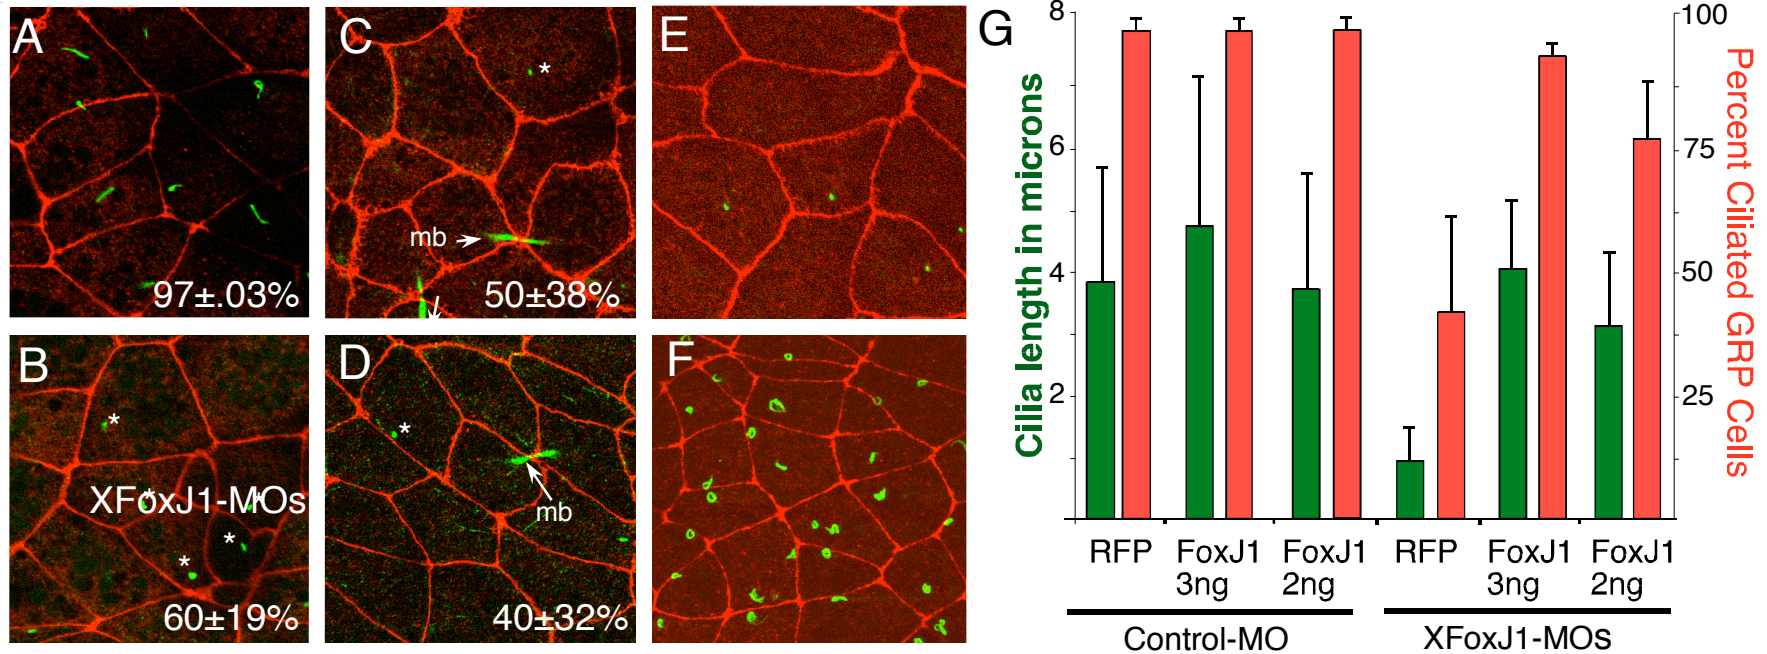

Supplementary Figure 3: Cilia formation and length in the GRP of FoxJ1 morphants.

(A-D) The GRP was imaged at stage 16 in embryos that were injected at the two-cell stage with a control-morpholino (Cont), with XFoxJ1-MO<sup>ATG</sup> (atg), with XFoxJ1-MO<sup>SPL</sup> (spl) or with a mixture of both morpholinos. In each case, cell junctions (red) are stained with a ZO-1 antibody while cilia (green) are stained with an antibody directed against acetylated-tubulin. Shortened cilia are marked with an asterisk, and midbodies (MB) that stain with the acetylated tubulin antibody are marked with arrows. The percentage of ciliated GRP cells (%ciliated±S.D.) was determined by scoring a total of 100-120 cells from the center of the GRP from 5-6 embryos under each condition. (E-G) XFoxJ1 and control morphants were co-injected with 2 or 3ng of a flag-tagged form of *XFoxJ1* RNA or with RNA encoding red fluorescent protein (RFP) as a control. At stage 16, embryos were fixed, and processed for ZO-1 (red) and acetylated-tubulin staining (green) as above. Shown are cilia in the GRP cells of a XFoxJ1 morphant injected with RFP RNA (E), or with 3ng of flag-tagged *XFoxJ1* RNA (F). (G) The percentage of ciliated GRP cells (%ciliated ±S.D.), and cilia length (microns±S.D.) was determined by scoring a total of 100-120 cells from the center of the GRP of 5-6 embryos for each experimental condition.

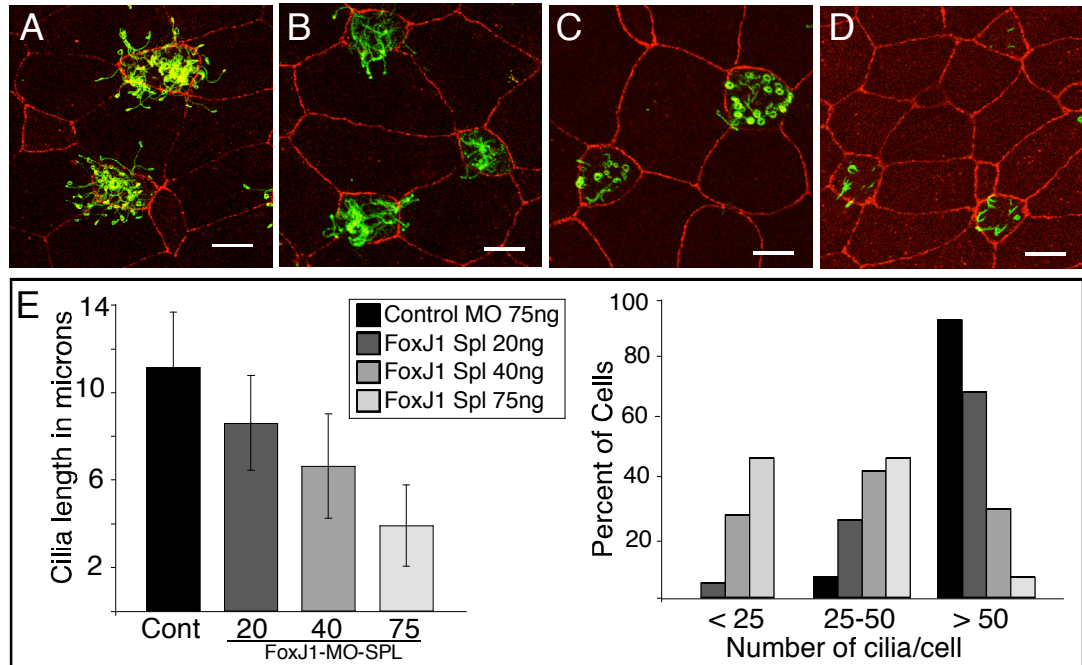

Supplementary Figure 4: Dose-dependent reduction of cilia number and length in the skin cells of XFoxJ1 morphants.

(A-D) Xenopus embryos were injected at the two-cell stage with 75ng of a control morpholino (A), or with 20ng (B), 40ng (C) or 75 ng (D) of XFoxJ1-MO<sup>SPL</sup>. At stage 26, embryos were fixed and stained with ZO-1 (red) and acetylated-tubulin (green) to visualize cell junctions and cilia, respectively, of multi-ciliate cells. Scale bar=10µm. (E) Cilia length (left plot) and cilia number/cell (right plot) was measured in multi-ciliate cells by scoring 100 cilia and forty cells, respectively, under the indicated experimental conditions.



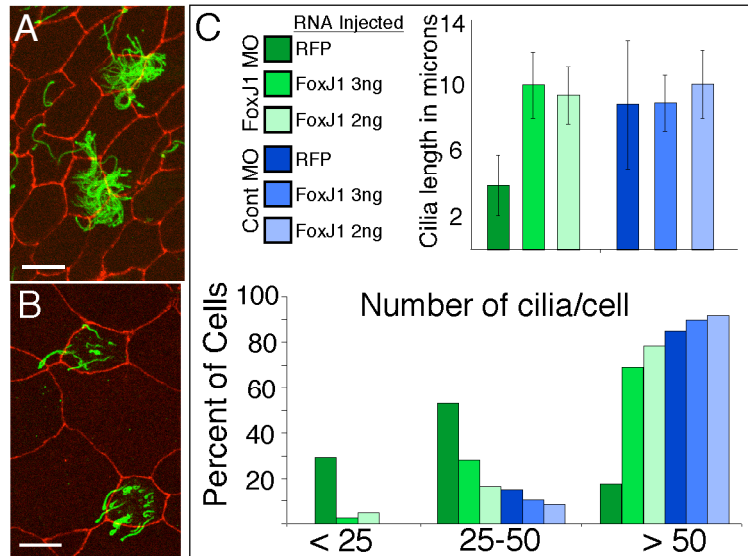

Supplementary Figure 5: *XFoxJ1* RNA rescues the cilia phenotypes in the skin cells of *XFoxJ1* morphants.

(A-B) *XFoxJ1* morphants were co-injected with 3ng of a flag-tagged form of *XFoxJ1* RNA (A) or with RNA encoding RFP (B) as a control. At stage 26, embryos were fixed and stained with ZO-1 (red) and acetylated-tubulin (green) to visualize cell junctions and cilia, respectively, in multi-ciliate cells. Scale bar=10 $\mu$ m. (C) *XFoxJ1* morphants or control morphants were co-injected with 2 or 3ng of a flag-tagged *XFoxJ1* RNA or with 1ng of *RFP* RNA as a control. Under each condition, cilia length (top plot) and cilia number/cell (bottom plot) was measured in multi-ciliate cells, by measuring approximately 100 cilia and forty cells, respectively.

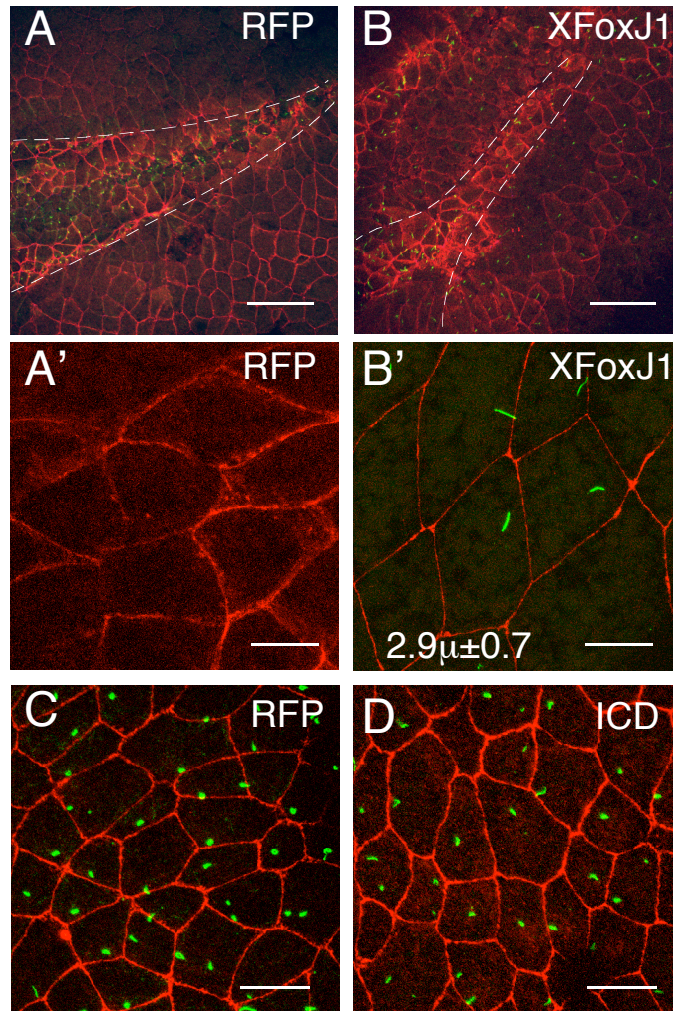

Supplementary Figure 6: Effects of XFoxJ1 and ICD on cilia formation on gastrocoel roof cells.

(A-D) *Xenopus* embryos were injected in the marginal zone at the two-cell stage with *RFP* RNA alone as a control or with *XFoxJ1* or *ICD* RNA along with *RFP* as a tracer, as indicated. At stage 17/18, dorsal explants were fixed and stained with ZO-1 and acetylated-tubulin antibodies to label cell junctions (red) and cilia (green), respectively. Panels A and B show low power images (scale bar= 100 $\mu$ m) with the GRP denoted within the dotted lines. Panels A' and B' show higher power images (scale bar=20 $\mu$ m) of cells in the lateral endoderm. The average length of ectopic cilia in the LEC is given in panel B' ( $\mu$ m  $\pm$  S.D.). *ICD* RNA injected into the marginal zone has no apparent effect on ciliogenesis in the GRP (D) compared to control (C). Scale bar=20 $\mu$ m.

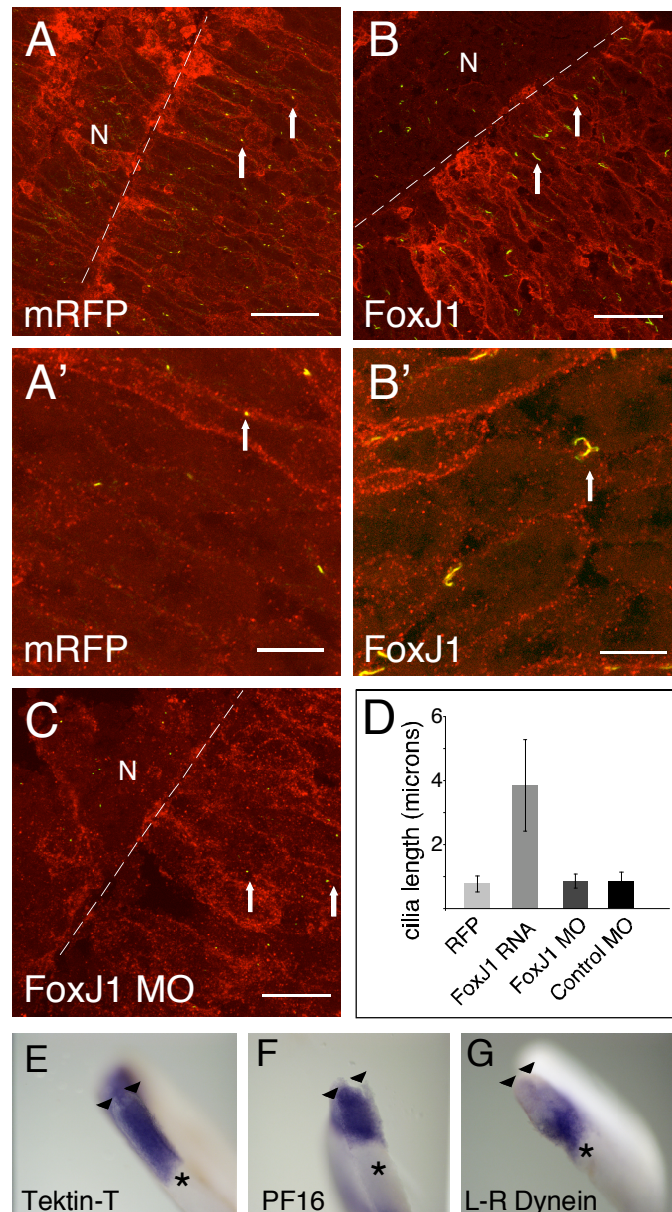

Supplementary Figure 7: Ectopic expression of *FoxJ1* RNA in mesodermal cells.

(A-D) *Xenopus* embryos were injected at the two-cell stage with both *XFoxJ1*-MOs, with a control morpholino or with 2ng of *XFoxJ1* RNA. *mRFP* RNA (red) was co-injected as a tracer to visualize cell membranes. At stage 12, Wilson explants were prepared from injected embryos to expose the dorsal mesoderm and cultured to stage 17/18 when they were fixed, and stained with the acetylated-tubulin antibody (green). In controls (A, A'), mesodermal cells form short, presumably primary cilia, that are unaffected in *FoxJ1* morphants (C), but that increase in length in *FoxJ1* RNA injected embryos (B, B'). Average length of mesodermal cilia was determined under each experimental condition by measuring the length of 30-50 cilia (D). Boundary between the notochord (N) and somitic mesoderm is denoted with a dotted line (A-C) (E-G) *XFoxJ1* RNA was injected into one blastomere of *Xenopus* embryos at the two-cell stage. At stage 17, dorsal explants were fixed and stained for the expression of the indicated cilia genes using whole-mount in situ hybridization. After staining, the explants were cleared in glycerol, cut in cross-section and viewed on edge. Arrowheads denote the outer and inner epithelia and the asterisk marks the approximate position of the midline, where injected side is oriented up and uninjected side oriented down. Note the dramatic upregulation of cilia gene expression in the mesoderm on the side injected with *FoxJ1* RNA. (A-C) Scale bar= 10 $\mu$ m (A', B') Scale bar=40 $\mu$ m

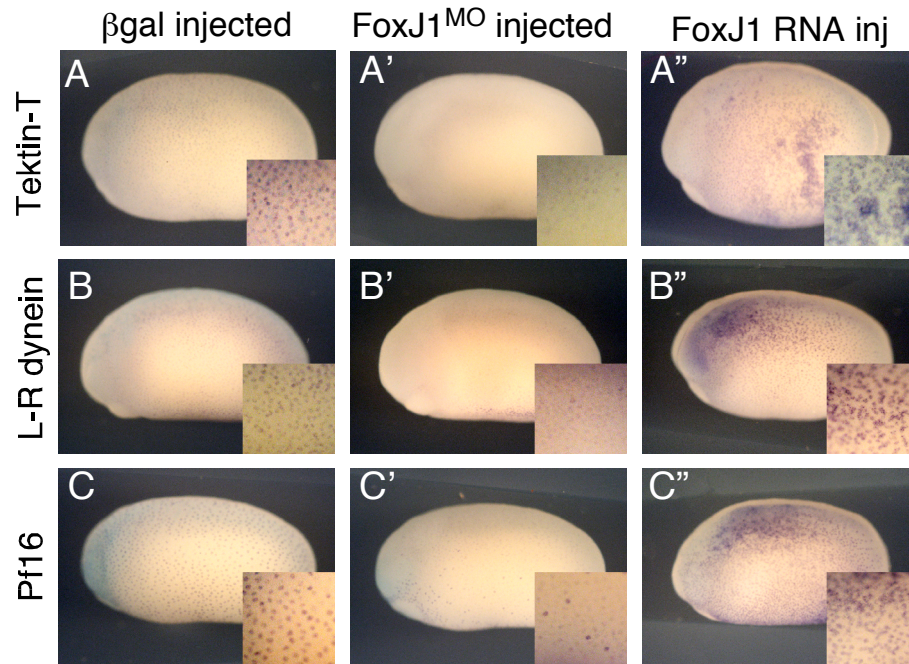

Supplementary Figure 8: Validation of gene expression regulated by FoxJ1.

(A-C) Expression of  *$\alpha$ -tubulin*, *L-R dynein* and *PF16* (*Spag6*) was determined using whole-mount, in situ hybridization in  $\beta$ -gal injected control embryos or in embryos injected with *XFoxJ1* RNA or with *XFoxJ1* morpholinos.



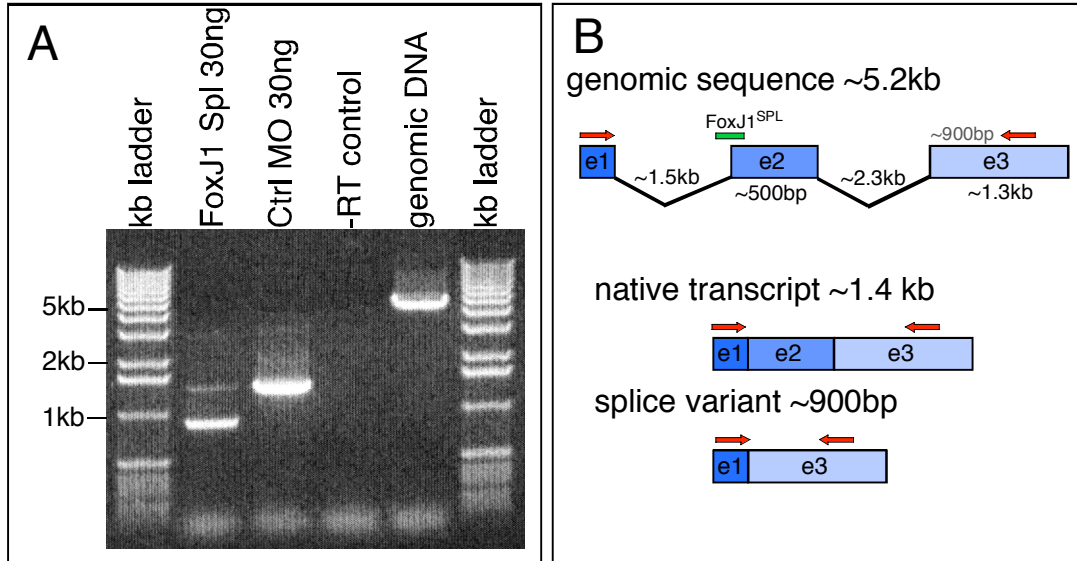

Supplementary Figure 9: XFoxJ1<sup>SPL</sup> effectively blocks mRNA splicing

(A) Gel showing the reaction products generated during RT-PCR from total RNA from explants of embryos injected with 30ng of XFoxJ1-MO<sup>SPL</sup>, or with a control morpholino. PCR reactions with -RT or with *Xenopus* genomic DNA are also shown as controls. The major band in Lane 3 corresponds to the mature XFoxJ1 transcript (~1.4kb) while that in lane 2 corresponds to a splicing variant (~900bp) as indicated in B. The major band in lane 5 shows the genomic fragment of ~5.2kb that corresponds to unspliced *XFoxJ1* mRNA. (B) Schematic of the *XFoxJ1* gene containing 3 exons and two introns. Red arrows denote primers used to amplify PCR fragments.

Location of XFoxJ-MOSPL morpholino is marked by the green box at the intron1/exon2 boundary. Sequencing of the ~900bp band in lane 2 indicates that XFoxJ1<sup>SPL</sup>-MO morpholino generates an alternate splice variant eliminating exon 2 and causing a frameshift in the ORF.

## Supplementary Table 1

Microarray analysis of genes induced by *FoxJ1* in *Xenopus* ectoderm

Legend: Total RNA from explanted ectoderm was used to generate labeled complimentary RNA (cRNA) that was hybridized to *Xenopus laevis* Genome Array chips (Affymetrix #900491). Three data sets were generated using ectoderm injected with *ICD* RNA and two from ectoderm injected with both *XFoxJ1* and *ICD* RNA. Shown are the genes whose RNA levels changed greater than 10-Fold on average (Avg FC ratio) in a pairwise comparison of FoxJ1/*ICD* data sets to the *ICD* data sets. Structural Motifs and human homologs were identified based on assignment of Unigene identifiers to Homologene.

| Genbank    | Unigene  | Avg FC Ratio | Ciliome | Structural Motifs         | Human     | Description                                                       |
|------------|----------|--------------|---------|---------------------------|-----------|-------------------------------------------------------------------|
| BC043831.1 | XI.66678 | 119.43       | No      | Coiled-Coiled             | C14orf45  | Coiled-coiled protein of unknown function with SMC2/SMC4 Homology |
| BJ045367   | XI.14154 | 84.45        | No      | None                      | LOC342346 | Conserved protein of unknown function                             |
| BJ056774   | XI.14621 | 53.2         | No      | Coiled-Coiled             | CCDC105   | Coiled-coiled protein of unknown function                         |
| BJ087835   | XI.4890  | 48.5         | No      | Coiled-Coiled/SMC         | CCDC78    | Coiled-coiled protein of unknown function with SMC domain         |
| BJ092720   | XI.72200 | 44.74        | No      | None                      | None      | ESTs and homolog to Trop but no clear coding sequence             |
| BC054332   | XI.12692 | 42.71        | No      | DCX                       | DCDC2B    | Doublecortin related                                              |
| BJ091326   | XI.5053  | 40.79        | No      | None                      | None      | Unknown                                                           |
| BJ053550   | XI.64350 | 40.32        | Yes     | IQ calmodulin, AAA Atpase | IQCA      | Tropicalis 155843, AAA Atpase, and IQ calmodulin                  |
| BM180891   | XI.14916 | 38.05        | Yes     | TPR                       | TTC12     | Trop 175168, Conserved TPR domain protein of unknown function     |
| BQ736249   | XI.15616 | 37.62        | Yes     | Tektin                    | TEKT3     | <i>Xenopus</i> homolog of Tektin 3                                |
| BC043740.1 | XI.20447 | 37.62        | Yes     | Tektin                    | TEKT2     | <i>Xenopus</i> homolog of Tektin 2                                |
| BC044268.1 | XI.66656 | 33.9         | No      | HLH-PAS                   | ARNT2     | <i>Xenopus</i> homolog of ARNT2                                   |
| BC049290.1 | XI.3026  | 33.13        | Yes     | Dpy-30 ADK                | AK7       | <i>Xenopus</i> homolog of adenylate kinase 7                      |
| BG346046   | XI.9077  | 30.55        | No      | WD40 Repeat               | WDR16     | WD-40 repeat conserved protein of unknown function                |
| BQ398517   | XI.13942 | 30.2         | Yes     | Dynein                    | DNAH9     | Dynein Arm Heavy Chain Axonemal                                   |
| CD361045   | XI.26415 | 29.86        | No      | None                      | TEPP      | testis/prostate/placenta-expressed protein, unknown function      |
| BJ085862   | XI.2458  | 29.51        | No      | None                      | C15orf26  | Conserved protein with no known function                          |

Supplemental Table 1 Stubbs et al

|            |          |       |     |                           |                 |                                                                 |
|------------|----------|-------|-----|---------------------------|-----------------|-----------------------------------------------------------------|
| BJ087968   | XI.72243 | 29.18 | No  | Coiled-coiled             | CCDC27          | Coiled-coiled protein of unknown function                       |
| BJ076039   | XI.52119 | 27.86 | No  | None                      | None            | ESTs and homolog to Trop but no clear coding sequence           |
| BG346004   | XI.1504  | 27.86 | Yes | Radial Spoke Protein      | RSHL2           | Xenopus homolog of Radial spokehead-like 2                      |
| BJ085557   | XI.13305 | 27.22 | No  | None                      | C9orf116        | Similar to C9orf116, little sequence                            |
| BJ054388   | XI.15406 | 26.91 | No  | None                      | None            | ESTs and homolog to Trop but no clear coding sequence           |
| AW767950   | XI.11087 | 26.91 | Yes | DM10                      | EFHC1           | Etiology JME                                                    |
| AF032383.1 | XI.401   | 26.6  | No  | reprolyin ACR DISIN       | ADAM22          | metalloprotease-disintegrin                                     |
| BJ082172   | XI.15603 | 26.6  | Yes | WD40 Repeat               | WDR66           | Trop 456177, WD-40 repeat conserved protein of unknown function |
| BG020671   | XI.66678 | 25.11 | No  | Coiled-Coiled             | C14orf45        | Trop 03155                                                      |
| BG020958   | XI.34888 | 24.53 | No  | MAP65_ASE1, coiled-coiled | CCDC87          | Trop 172009: microtubule associated protein.                    |
| BG020534   | XI.3108  | 24.53 | No  | L6 membrane protein       | TM4SF18         | transmembrane 4 superfamily member 18                           |
| BM192326   | XI.25877 | 24.53 | Yes | ADK                       | AK5             | Xenopus homolog of adenylate kinase 1                           |
| BJ050954   | XI.13352 | 23.97 | Yes | Morn Domains              | TSGA2           | Testis specific A2 homolog                                      |
| BI444329   | XI.18717 | 23.7  | No  | L6 membrane protein       | TM4SF1          | tetraspanin-1                                                   |
| BJ051776   | XI.16114 | 23.7  | No  | hormone beta chain        | LHB             | Trop 377323 Leutinizing hormone Beta                            |
| BG021827   | XI.53283 | 23.7  | Yes | None                      | C13orf26        | Conserved protein with no known function                        |
| BJ048155   | XI.12380 | 22.89 | Yes | Coiled-Coiled             | CCDC19          | Similar to nasopharyngeal epithelium specific protein 1         |
| BC041210.1 | XI.7299  | 22.63 | Yes | DUF1309                   | ODF3            | Xenopus homolog of Shippo1, outer dense fiber                   |
| BG345897   | XI.30012 | 21.36 | Yes | Tektin                    | TEKT1           | Xenopus homolog of Tektin 1                                     |
| BJ090821   | XI.46928 | 20.16 | Yes | Armadillo repeats         | Spag6           | Xenopus homolog of Spag6                                        |
| BF232441   | XI.77966 | 19.93 | No  | Leucine-rich repeat       | Leucine-rich 50 | Related to regulator of chromosome condensation 1               |
| BJ050529   | XI.72323 | 19.93 | No  | 7tm_3                     | GPR156          | Trop 205043, G-coupled receptor of unknown function             |
| BI313854   | XI.24195 | 19.93 | Yes | ADK                       | AK5             | Xenopus homolog of adenylate kinase 1                           |
| BJ075928   | XI.72612 | 19.7  | No  | SMC                       | C6orf97         | Not trop, SMC containing protein of unknown function            |
| BJ090136   | XI.7994  | 19.7  | Yes | Dynein Heavy Chain        | DNAH8           | Inner Dynein Arm Heavy Chain 1-alpha                            |
| BJ056722   | XI.12819 | 19.25 | No  | GMP reductase             | GMPR2           | GMP reductase                                                   |
| BJ078477   | XI.16776 | 19.03 | No  | Coiled-Coiled/SMC         | CCDC63          | Conserved Coiled-Coiled domain protein                          |
| BC042360.1 | XI.57221 | 19.03 | Yes | Armadillo repeats         | Armc4           | Conserved protein with no known function                        |
| AW643289   | XI.16654 | 18.81 | No  | DUF667                    | C16orf80        | Highly conserved protein of unknown function                    |
| BG816831   | XI.17997 | 18.81 | Yes | NDK Domain, Dyp-30        | NME5            | Xenopus homolog Nucleoside diphosphate kinase homolog 5         |
| BJ078979   | XI.16545 | 18.59 | Yes | Tektin                    | TEKT4           | Xenopus homolog of Tektin 4                                     |
| BJ088741   | XI.16441 | 17.75 | No  | WD40 Repeat               | WDR16           | WD-40 repeat conserved protein of unknown function              |
| BJ080667   | XI.13986 | 17.75 | No  | IQ-Calmodulin             | IQCH            | Trop268243, NYD-SP5                                             |
| BJ085065   | XI.16226 | 17.75 | No  | IQ-Calmodulin             | None            | trop 407388                                                     |
| BJ089527   | XI.16412 | 17.55 | No  | WD40 Repeat               | WDR49           | WD-40 repeat conserved protein of unknown function              |

Supplemental Table 1 Stubbs et al

|            |          |       |     |                             |              |                                                                    |
|------------|----------|-------|-----|-----------------------------|--------------|--------------------------------------------------------------------|
| BJ043529   | XI.16202 | 17.35 | No  | None                        | None         | trop 165923, Protein not conserved, no motifs                      |
| BI446883   | XI.18853 | 17.35 | No  | DPY-30                      | DYDC1        | Conserved protein of unknown function                              |
| BJ078884   | XI.16772 | 17.15 | Yes | Dynein                      | DNAL1        | dynein, axonemal, light intermediate chain                         |
| BC046664.1 | XI.64437 | 17.15 | Yes | DUF1309                     | ODF3         | Xenopus homolog of Shippo1, outer dense fiber                      |
| AB085631.1 | XI.21383 | 17.15 | Yes | Ank Calcium Transporter     | TRP channels | Xenopus calcium transporter 2                                      |
| BJ086673   | XI.15012 | 16.76 | No  | None                        | LOC463933    | Tropicalis Coding, related to human hypothetical LOC463933         |
| BF072033   | XI.6973  | 16.56 | No  | Robl_LC7                    | DYNLRB2      | Dynein-associated protein Roadblock                                |
| CD326460   | XI.26316 | 16.56 | No  | DUF1042                     | C20orf28     | Xenopus homolog of sperm flagellar one                             |
| BG159877   | XI.11546 | 16.37 | No  | WD40 Repeat                 | None         | Trop 156021                                                        |
| BI315451   | XI.18412 | 16.19 | Yes | IQ-Calmodulin, RIIa         | SPA17        | Trop 183347 PKCRegulatory subunit portion of type II PKA R-subunit |
| BJ055178   | XI.16599 | 16    | Yes | WD40 Repeat                 | DNAI1        | Homolog of dynein, axonemal, intermediate chain 1                  |
| BJ089387   | XI.12681 | 15.82 | No  | WD40 Repeat                 | WDR69        | WD-40 repeat conserved protein of unknown function                 |
| BJ079557   | XI.14126 | 15.82 | No  | None                        | None         | Repetitive sequences                                               |
| BI446799   | XI.15888 | 15.82 | No  | Leucine-Rich Repeats        | LRRC34       | Trop 448354                                                        |
| BC049289.1 | XI.14119 | 15.82 | Yes | Spectrin repeats            | SYNE1        | Trop 349414                                                        |
| BI447010   | XI.78572 | 15.28 | No  | Ankyrin Repeats             | ANKRD45      | Conserved ankyrin repeat protein                                   |
| CD325641   | XI.8555  | 14.93 | No  | Reticulon                   | RTN1         | reticulon 1-C.2                                                    |
| BG017455   | XI.9808  | 14.76 | No  | None                        | C14orf50     | Conserved protein with no known function                           |
| BJ079815   | XI.15440 | 14.76 | No  | C2H2 Zinc Finger gene model | C8orf70      | Trop 171270                                                        |
| BJ086368   | XI.13468 | 14.59 | No  | None                        | None         | ESTs and homolog to Trop but no clear coding sequence              |
| AW766365   | XI.15197 | 14.42 | No  | WD40 Repeat                 | WDR38        | WD-40 repeat conserved protein of unknown function                 |
| BC044984.1 | XI.23512 | 14.42 | No  | Homeodomain                 | HOXA1        | HoxA1                                                              |
| BJ098965   | XI.15885 | 14.25 | Yes | Leucine-Rich repeats        | LRRC51       | No known function                                                  |
| BJ091895   | XI.72241 | 13.93 | No  | DUF1208                     | FAM92B       | Little sequence no tropicalis, although conserved protein          |
| BI348453   | XI.78688 | 13.93 | Yes | Ropporin-like               | ROPN1L       | Fibrous sheath of Sperm                                            |
| BF071920   | XI.10706 | 13.77 | No  | Tctex-1                     | TCTEX1D1     | Dynein light chain                                                 |
| BJ046781   | XI.51228 | 13.3  | No  | F-Box                       | FBXO31       | Trop 169553                                                        |
| BJ054660   | XI.16566 | 13.3  | No  | ADK, Adenylate Kinase       | C9orf98      | Unknown function                                                   |
| BJ055241   | XI.15554 | 13.15 | Yes | Armadillo, SRP1             | RTDR1        | Rhap Tumor deleted                                                 |
| AB022088.1 | XI.1220  | 13    | No  | P450                        | CYP1A1       | cytochrome P450                                                    |
| BJ043754   | XI.73054 | 12.7  | No  | S-TKc                       | NEK5         | Trop 467014, NIMA related kinase                                   |
| BJ048763   | XI.15384 | 12.7  | No  | None                        | C6orf206     | Conserved protein with no known function                           |
| BJ083558   | XI.6950  | 12.27 | No  | None                        | KIAA1370     | Conserved protein of unknown function                              |
| BJ082817   | XI.68845 | 12.27 | No  | Calponin, IG-Filamin        | FLNC         | Actin Binding, Filamin related                                     |
| BQ399047   | XI.80150 | 12.27 | No  | B41, SH2, TyrKc             | JAK2         | JAK2, Tyrosine-protein kinase                                      |



Supplemental Table 1 Stubbs et al

|            |          |       |     |                        |         |                                                                     |
|------------|----------|-------|-----|------------------------|---------|---------------------------------------------------------------------|
| CB756314   | XI.81323 | 12.27 | Yes | PDEase_I,              | PDE4D   | 3,5-cyclic phosphodiesterase type 9                                 |
| BJ081503   | XI.10830 | 12.13 | No  | None                   | C9orf68 | Conserved protein with no known function                            |
| AW767983   | XI.11177 | 11.99 | No  | WD40 Repeat            | WDR63   | Trop 304328 NYD-SP29 Conserved WD40 protein of unknown function     |
| BJ075955   | XI.13768 | 11.85 | No  | None                   | None    | Little sequence no tropicalis                                       |
| BF232515   | XI.46978 | 11.71 | No  | C2H2 Zinc Finge        | C8orf70 | Trop 171270                                                         |
| BJ076059   | XI.15389 | 11.58 | No  | None                   | None    | Coding sequence, homolog to Trop sequence and to hypothetical genes |
| BG017110   | XI.11474 | 11.58 | No  | Coiled-Coiled          | CCDC96  | Tr 468393                                                           |
| BJ083290   | XI.17968 | 11.31 | No  | None                   | SPAG8   | Similar to Spag8                                                    |
| BG019848   | XI.9878  | 11.18 | No  | None                   | None    | Coding sequence, homolog to Trop sequence and to hypothetical genes |
| BC046665.1 | XI.9878  | 11.18 | No  | DCX                    | DCDC2   | RU2S double cortin domains                                          |
| BJ045936   | XI.73464 | 11.06 | No  | None                   | None    | Repetitive sequences                                                |
| BJ043994   | XI.13320 | 11.06 | Yes | Radial Spoke Protein   | RSHL3   | Radial Spoke related                                                |
| BJ049223   | XI.73126 | 10.8  | No  | None                   | None    | ESTs and homolog to Trop but no clear coding sequence               |
| BJ048577   | XI.22500 | 10.8  | No  | Leucine-rich repeat    | LRRC27  | LRR protein of unknown function                                     |
| BF072242   | XI.10381 | 10.56 | No  | Tyrosine Kinase Domain | RAGE    | Related to Long flagellar protein 4                                 |
| BC041731.1 | XI.9439  | 10.56 | No  | Homeodomain            | HOXA3   | Xenopus homolog of homeo box A3                                     |
| BJ084139   | XI.15806 | 10.43 | Yes | KIF9 Kinesin           | KIF9    | Trop 401497 Kinesin                                                 |

Supplemental Table 2  
Morpholino and Primer sequences used in this study

Morpholino

| Name                     | Sequence                         |
|--------------------------|----------------------------------|
| XFoxJ1-MO <sup>ATG</sup> | 5'-GCAGGTCAAACATTAATAAAGCCCT-3'  |
| XFoxJ1-MO <sup>SPL</sup> | 5'-TGCTCCTACAATGCAA-GCAGAGAAT-3' |
| XControl                 | 5'-GGATGGTGCAGAGTCTCCATCAGTA-3'  |
| ZFoxJ1 <sup>MO</sup>     | 5'-CATGGAGAGCATGGTCCTGACAAAT-3'  |
| ZControl                 | 5'-CCTCTTACCTCAGTTACAATTTATA-3'  |

Primers

| Primer Name   | Sequence                       |
|---------------|--------------------------------|
| ODC-F         | 5'-CTGCCGCCTCAGTGTGAA-3'       |
| ODC-R         | 5'-TGCCCGCTCCAGAAGC-3'         |
| DHC9-F        | 5'-CAGAATCCAGCCATCCGTG-3'      |
| DHC9-R        | 5'-TTGTGAACCGAACACCAGTTG-3'    |
| Pf16-F        | 5'-AAGAAAGCAGCAGCCTTTGTG-3'    |
| Pf16-R        | 5'-CCCCAGAGTCCACTATTGACTGA-3'  |
| Tektin-F      | 5'-CGCAATGAGACAAGCAACCA-3'     |
| Tektin-R      | 5'-CACGTCATCTATGCGTTCATCA-3'   |
| Splicing MO-F | 5'-GCTGTTGCTGCTGCTTCCAGAACC-3' |
| Splicing MO-R | 5'-TATATAGGAACCCAAGGACG-3'     |
